# Supplementary material for: Comparative Transcriptome Analysis of Defense Response of Potato to Phthorimaea operculella Infestation
Source: MDPI journal article supplement (doi:10.3390/plants12173092), 2023-08-29
Supplement: s1 [file s1]

Table 1 Summary table of RNA-Seq data in potato leaves

| Samples | Condition                | RawData  | CleanData(%)         | Total_mapped(%)      | Unique_mapped(%)     | GC(%) | Q30(%) |
|---------|--------------------------|----------|----------------------|----------------------|----------------------|-------|--------|
| M96-1   | Mechanically wounded 96h | 37707648 | 37676036<br>(99.92%) | 16500227<br>(85.40%) | 15778037<br>(81.66%) | 48.15 | 94.09  |
| M96-2   | Mechanically wounded 96h | 45922498 | 45869590<br>(99.88%) | 21053536<br>(86.01%) | 20150808<br>(82.33%) | 47.08 | 92.86  |
| M96-3   | Mechanically wounded 96h | 46768008 | 46714340<br>(99.89%) | 14524511<br>(81.89%) | 14048153<br>(79.21%) | 47.89 | 93.05  |
| M48-1   | Mechanically wounded 48h | 44280402 | 44222018<br>(99.87%) | 36912137<br>(89.43%) | 35348404<br>(85.64%) | 45.26 | 92.99  |
| M48-2   | Mechanically wounded 48h | 37271202 | 37224532<br>(99.87%) | 30191224<br>(88.64%) | 29003286<br>(85.16%) | 45.17 | 93.00  |
| M48-3   | Mechanically wounded 48h | 45901504 | 45844272<br>(99.88%) | 38897352<br>(88.05%) | 37499435<br>(84.89%) | 44.37 | 92.89  |
| M3-1    | Mechanically wounded 3h  | 41353642 | 41298248<br>(99.87%) | 36457874<br>(91.10%) | 34627575<br>(86.53%) | 45.19 | 93.55  |
| M3-2    | Mechanically wounded 3h  | 38712098 | 38656650<br>(99.86%) | 33930587<br>(90.71%) | 32142822<br>(85.93%) | 44.97 | 92.86  |
| M3-3    | Mechanically wounded 3h  | 43119864 | 43059952<br>(99.86%) | 37577840<br>(91.12%) | 35460267<br>(85.98%) | 45.29 | 93.24  |
| P48-1   | PTM infested 48h         | 42299580 | 42234264<br>(99.85%) | 36464478<br>(87.84%) | 34703464<br>(83.60%) | 44.62 | 92.41  |
| P48-2   | PTM infested 48h         | 51584672 | 51477964<br>(99.79%) | 44293524<br>(89.08%) | 42138355<br>(84.75%) | 44.84 | 91.08  |
| P48-3   | PTM infested 48h         | 49901750 | 49842562<br>(99.88%) | 26797724<br>(89.62%) | 25384839<br>(84.89%) | 46.59 | 93.47  |
| P96-1   | PTM infested 96h         | 43643080 | 43594140<br>(99.89%) | 36330322<br>(86.65%) | 34681035<br>(82.72%) | 44.92 | 93.36  |

|        |                             |          |                      |                      |                      |       |       |
|--------|-----------------------------|----------|----------------------|----------------------|----------------------|-------|-------|
| P96-2  | PTM infested<br>96h         | 41652304 | 41607824<br>(99.89%) | 17893637<br>(86.59%) | 17113035<br>(82.81%) | 47.31 | 93.22 |
| P96-3  | PTM infested<br>96h         | 39238544 | 39179152<br>(99.85%) | 33806616<br>(89.26%) | 32404891<br>(85.56%) | 44.52 | 92.87 |
| P3-1   | PTM infested<br>3h          | 45266476 | 45202030<br>(99.86%) | 38317436<br>(89.41%) | 36684882<br>(85.60%) | 44.74 | 92.99 |
| P3-2   | PTM infested<br>3h          | 44177308 | 44111112<br>(99.85%) | 37953309<br>(90.05%) | 36329083<br>(86.19%) | 45.00 | 93.42 |
| P3-3   | PTM infested<br>3h          | 44838608 | 44777686<br>(99.86%) | 39005195<br>(89.86%) | 37372634<br>(86.10%) | 44.68 | 92.48 |
| CK3-1  | Non-infested<br>Control 3h  | 39460346 | 39406094<br>(99.86%) | 34583804<br>(90.46%) | 32799283<br>(85.79%) | 44.98 | 92.57 |
| CK3-2  | Non-infested<br>Control 3h  | 51880920 | 51836050<br>(99.91%) | 45869528<br>(91.75%) | 42974467<br>(85.96%) | 46.07 | 93.61 |
| CK3-3  | Non-infested<br>Control 3h  | 41018148 | 40950074<br>(99.83%) | 33625251<br>(84.44%) | 32027461<br>(80.43%) | 45.05 | 92.23 |
| CK48-1 | Non-infested<br>Control 48h | 39152258 | 39104126<br>(99.88%) | 34047057<br>(89.70%) | 32780601<br>(86.36%) | 44.65 | 92.64 |
| CK48-2 | Non-infested<br>Control 48h | 44322740 | 44274964<br>(99.89%) | 38202593<br>(89.53%) | 36643663<br>(85.87%) | 44.93 | 92.81 |
| CK48-3 | Non-infested<br>Control 48h | 45283274 | 45234938<br>(99.89%) | 39183555<br>(89.73%) | 37683121<br>(86.29%) | 44.70 | 92.80 |
| CK96-1 | Non-infested<br>Control 96h | 37576124 | 37532408<br>(99.88%) | 32603197<br>(90.38%) | 31338908<br>(86.87%) | 45.03 | 92.92 |
| CK96-2 | Non-infested<br>Control 96h | 48675922 | 48630226<br>(99.91%) | 42739893<br>(90.43%) | 40700631<br>(86.11%) | 45.05 | 93.44 |
| CK96-3 | Non-infested<br>Control 96h | 43034396 | 42983732<br>(99.88%) | 37378883<br>(89.91%) | 35759623<br>(86.01%) | 45.23 | 92.64 |

Note: RawData, the number of reads in the original data; CleanData (%), the number and proportion

of reads after raw data filtering in each sample; Total\_mapped (%), the number and proportion of reads matched to potato genome.
